# Supplementary material for: Comparison of antibody persistency through one year between one-dose and two-dose regimens of Ad5-nCoV vaccine for COVID-19
Source: PubMed Central journal article supplement — Hum Vaccin Immunother. 2023 Jul 10;19(2):2230760. doi: 10.1080/21645515.2023.2230760 (PMC10334850; doi:10.1080/21645515.2023.2230760), 2023-07-10
Supplement: KHVI_A_2230760_SM5134.pdf [file KHVI_A_2230760_SM5134.pdf]

Supplementary Table 1. Baseline characteristics in one-dose and two-dose trial of Ad5-nCoV.

|                                                      | Low-dose group   |                  |                  | High-dose group  |                  |                  |
|------------------------------------------------------|------------------|------------------|------------------|------------------|------------------|------------------|
|                                                      | One-dose regimen | Two-dose regimen | p value          | One-dose regimen | Two-dose regimen | p value          |
| N                                                    | 129              | 118              | /                | 253              | 100              | /                |
| Age, years                                           |                  |                  |                  |                  |                  |                  |
| 18-55                                                | 116 (89.9%)      | 20 (16.9%)       | <b>&lt;0.001</b> | 223 (88.1%)      | /                | <b>&lt;0.001</b> |
| ≥56                                                  | 13 (10.1%)       | 98 (83.1%)       |                  | 30 (11.9%)       | 100 (100%)       |                  |
| mean(SD)                                             | 39.71 (12.13)    | 60.51 (8.58)     | <b>&lt;0.001</b> | 39.98 (12.78)    | 63.76 (5.10)     | <b>&lt;0.001</b> |
| Sex                                                  |                  |                  |                  |                  |                  |                  |
| male                                                 | 64 (49.6%)       | 64 (54.2%)       | 0.4675           | 126 (49.8%)      | 66 (66%)         | 0.0059           |
| female                                               | 65 (50.4%)       | 54 (45.8%)       |                  | 127 (50.2%)      | 34 (34%)         |                  |
| BMI                                                  | 24.23 (2.67)     | 25.08 (3.90)     | 0.0498           | 24.22 (2.77)     | 24.32 (2.99)     | 0.7776           |
| Pre-existing adenovirus type-5 neutralizing antibody |                  |                  |                  |                  |                  |                  |
| ≤1:200, titer                                        | 54 (41.9%)       | 46 (39.0%)       | 0.6454           | 127 (50.2%)      | 42 (42%)         | 0.1648           |
| >1:200, titer                                        | 75 (58.1%)       | 72 (61.0%)       |                  | 126 (49.8%)      | 58 (58%)         |                  |

Data are mean (SD), number of participants (%) and p value.

SD=standard deviation. BMI=body-mass index. GMT=geometric mean titer.

Supplementary Table 2. Correlation results by multiple linear regression using data at day 28 after the first Ad5-nCoV vaccination.

| One-dose regimen                                     | High-dose group<br>N=253 |         |                                   |         | Low-dose group<br>N=129 |         |                                   |         |
|------------------------------------------------------|--------------------------|---------|-----------------------------------|---------|-------------------------|---------|-----------------------------------|---------|
|                                                      | RBD-binding antibody     |         | pseudovirus neutralizing antibody |         | RBD-binding antibody    |         | pseudovirus neutralizing antibody |         |
| Independent variable                                 | correlation              | p value | correlation                       | p value | correlation             | p value | correlation                       | p value |
| BMI                                                  | 0.042                    | 0.252   | 0.084                             | 0.09    | 0.018                   | 0.418   | 0.047                             | 0.297   |
| Sex                                                  | -0.028                   | 0.329   | -0.126                            | 0.022   | 0.121                   | 0.086   | 0.045                             | 0.306   |
| Age                                                  | -0.278                   | <0.001  | -0.154                            | 0.007   | -0.316                  | <0.001  | -0.084                            | 0.171   |
| Pre-existing adenovirus type-5 neutralizing antibody | -0.392                   | <0.001  | -0.284                            | <0.001  | -0.275                  | 0.0008  | -0.179                            | 0.021   |
| Two-dose regimen                                     | high-dose group<br>N=100 |         |                                   |         | low-dose group<br>N=120 |         |                                   |         |
|                                                      | RBD-binding antibody     |         | pseudovirus neutralizing antibody |         | RBD-binding antibody    |         | pseudovirus neutralizing antibody |         |
| Independent variable                                 | correlation              | p value | correlation                       | p value | correlation             | p value | correlation                       | p value |
| BMI                                                  | 0.058                    | 0.282   | -0.041                            | 0.344   | -0.041                  | 0.327   | -0.164                            | 0.037   |
| Sex                                                  | 0.159                    | 0.057   | -0.100                            | 0.161   | 0.258                   | 0.002   | 0.143                             | 0.059   |
| Age                                                  | -0.112                   | 0.134   | -0.03                             | 0.384   | -0.359                  | <0.001  | -0.182                            | 0.023   |
| Pre-existing adenovirus type-5 neutralizing antibody | -0.224                   | 0.013   | -0.354                            | <0.001  | -0.295                  | <0.001  | -0.305                            | <0.001  |

Note: If the p value is less than 0.05, the independent variable is considered to be related to the dependent variable.

Supplementary Figure 1A. Trial profiles from one-dose regimen of Ad5-nCoV.

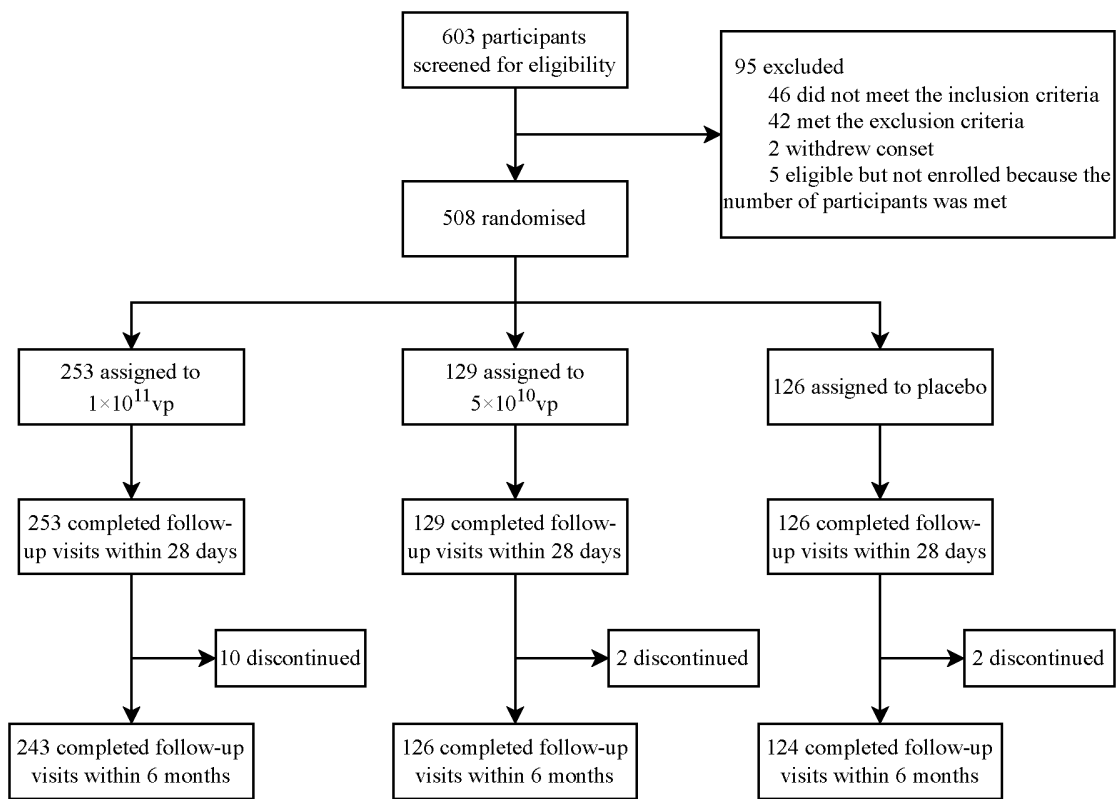

vp=viral particles.

Supplementary Figure 1B. Trial profiles from two-dose regimen of Ad5-nCoV.

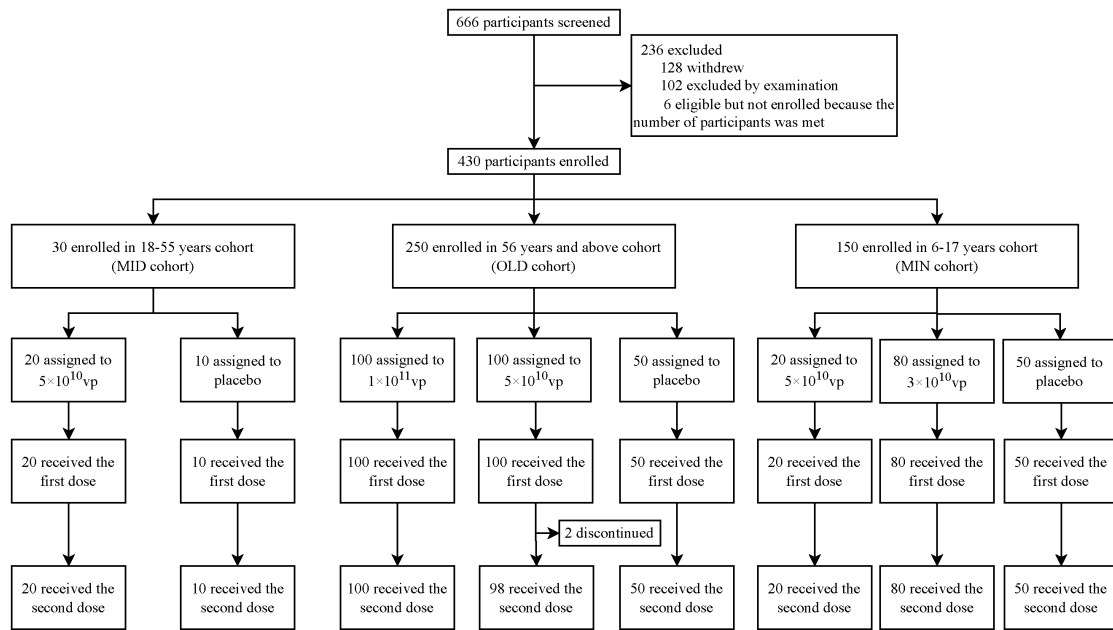

vp=viral particles.

Supplementary Figure 2. Compared antibody titers through 6 months between one-dose and two-dose regimens of Ad5-nCoV in matched participants after the last vaccination.

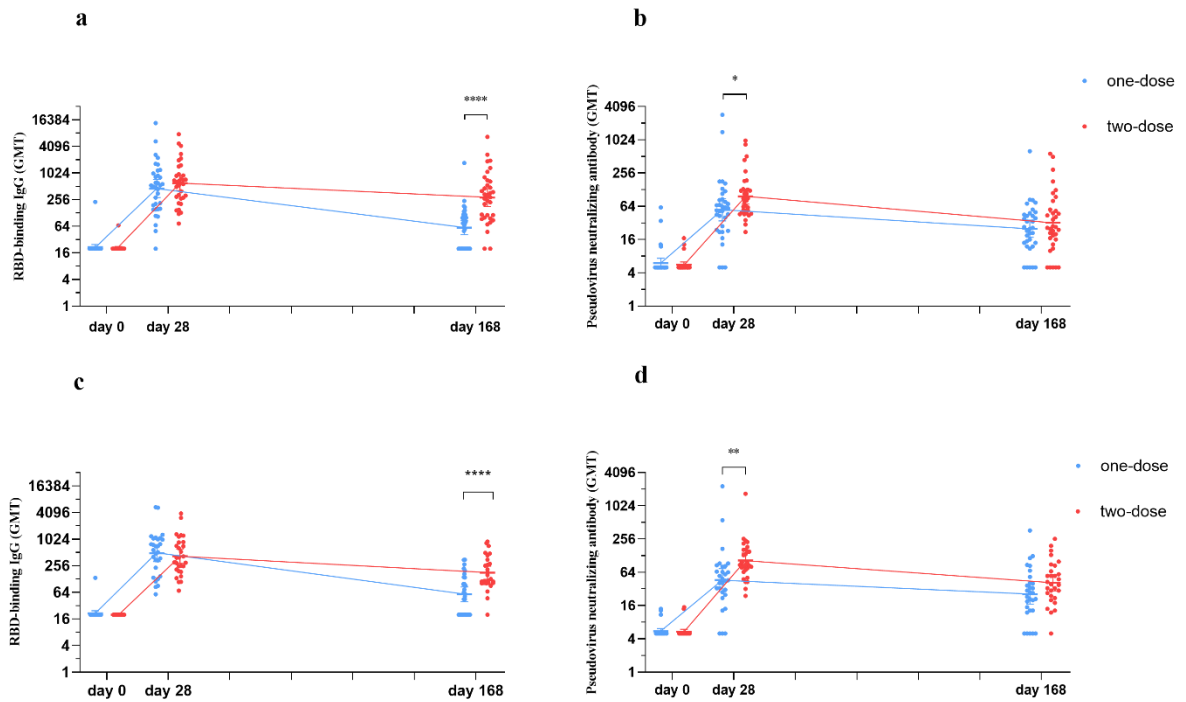

Note: Decay trends and GMTs of RBD-binding antibody in the low-dose groups (a). Decay trends and GMTs of pseudovirus neutralizing antibody in the low-dose groups (b). Decay trends and GMTs of RBD-binding antibody in the high-dose groups (c). Decay trends and GMTs of pseudovirus neutralizing antibody in the high-dose groups (d). Titers at day 0 showed antibody titers before vaccination. Blue line charts and dots presented antibodies in one-dose regimen of Ad5-nCoV at day 28 and month 6 after vaccination. Red line charts and dots at day 28 and month 6 presented antibodies after the second vaccination in two-dose regimen of Ad5-nCoV. Error bars indicated 95% CIs. n, the number of participants after propensity score matching. \* represents  $p$  value less than 0.05, \*\* represents  $p$  value less than 0.01 and \*\*\*\* represents  $p$  value less than 0.0001.
